# Supplementary material for: Construction of PANoptosis signature: Novel target discovery for prostate cancer immunotherapy
Source: PubMed Central journal article supplement (PMC10400972; doi:10.1016/j.omtn.2023.07.010), 2023-07-15
Supplement: mmc1.pdf [file mmc1.pdf]

OMTN, Volume 33

## **Supplemental information**

### **Construction of PANoptosis signature: Novel target discovery for prostate cancer immunotherapy**

**Xianyanling Yi, Jin Li, Xiaonan Zheng, Hang Xu, Dazhou Liao, Tianyi Zhang, Qiang Wei, Hong Li, Jiajie Peng, and Jianzhong Ai**

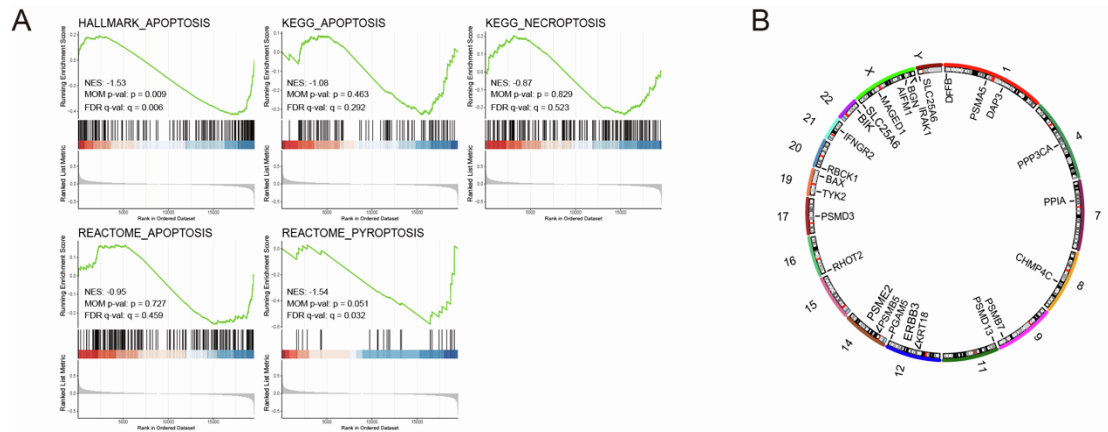

**Figure S1. Perturbations and status of gene mutation in the PANoptosis pathway in PRAD. A** The GSEA enrichment plot shows differential enrichment between age  $\geq 60$  years and age  $< 60$  years groups in “REACTOME\_PYROPTOSIS, HALLMARK\_APOPTOSIS, KEGG\_APOPTOSIS, REACTOME\_APOPTOSIS, and KEGG\_NECROPTOSIS.” **B** Distribution of PANoptosis pathway genes on each chromosome is presented on the Circos plot.

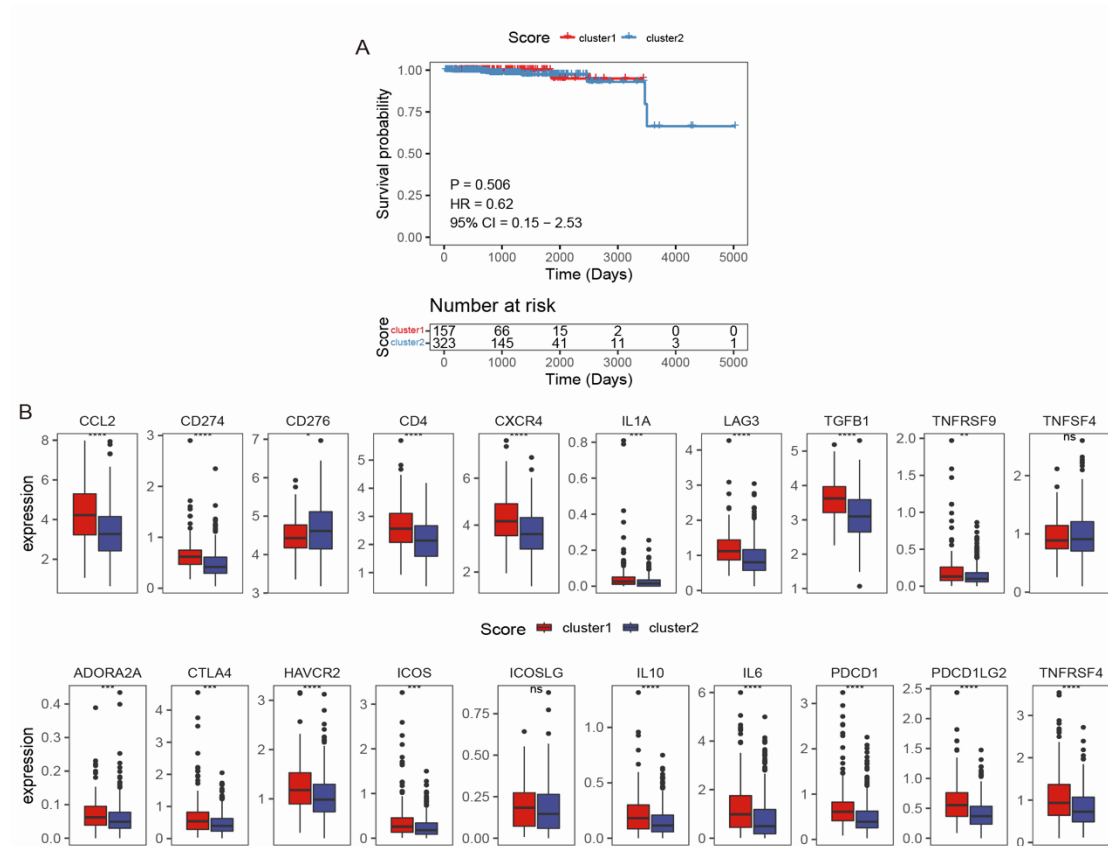

**Figure S2. Survival and expression level of immune checkpoint regulators in subgroups of patients differentiated by methylation levels. A** Survival probability between the subgroups. **B**

The expression level of immune checkpoint regulators. \* $P \leq 0.05$ , \*\* $P \leq 0.01$ , \*\*\* $P \leq 0.001$ , \*\*\*\* $P \leq 0.0001$ , ns: not significant.

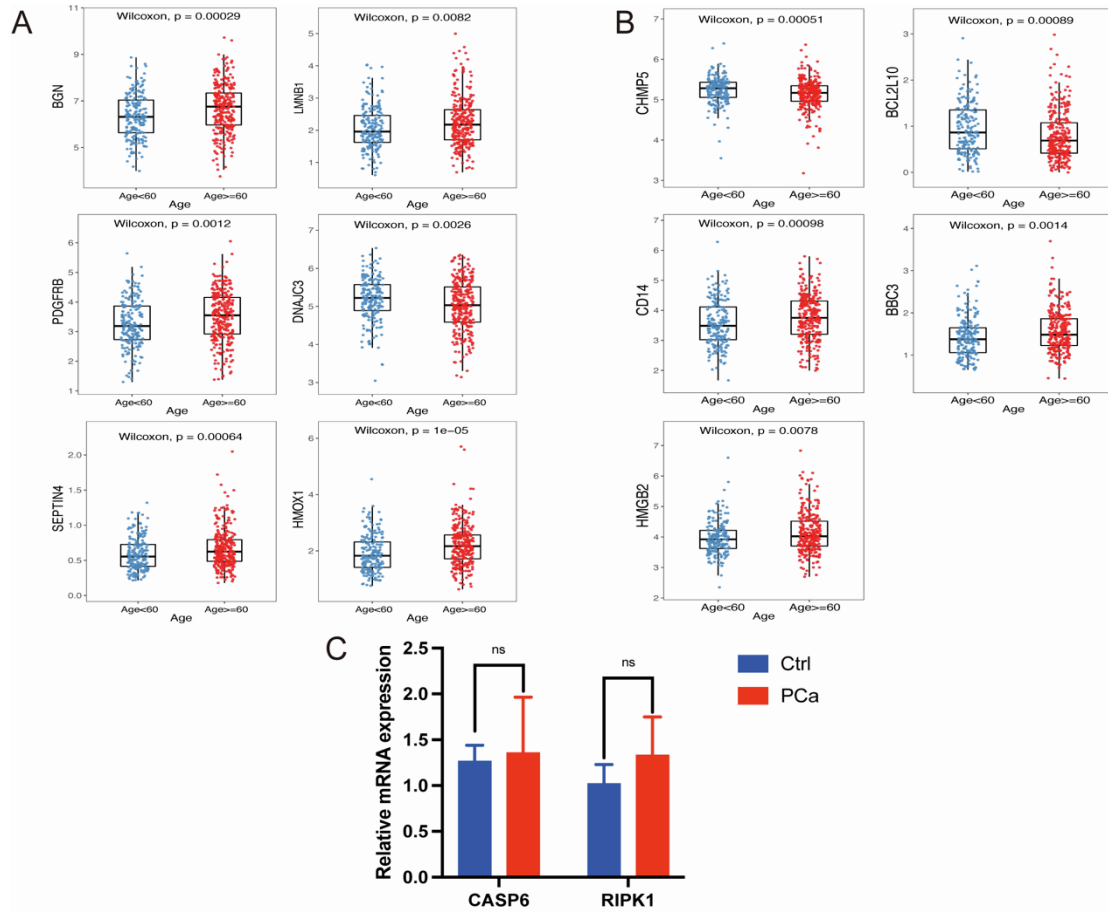

**Figure S3. Expression levels of PANoptosis pathway genes and key molecules of PANoptosis.**  
**A, B** Differential expression of PANoptosis pathway genes in patients aged  $\geq 60$  and  $< 60$  years. **B** qPCR for PANoptosis key molecules. ns: not significant.

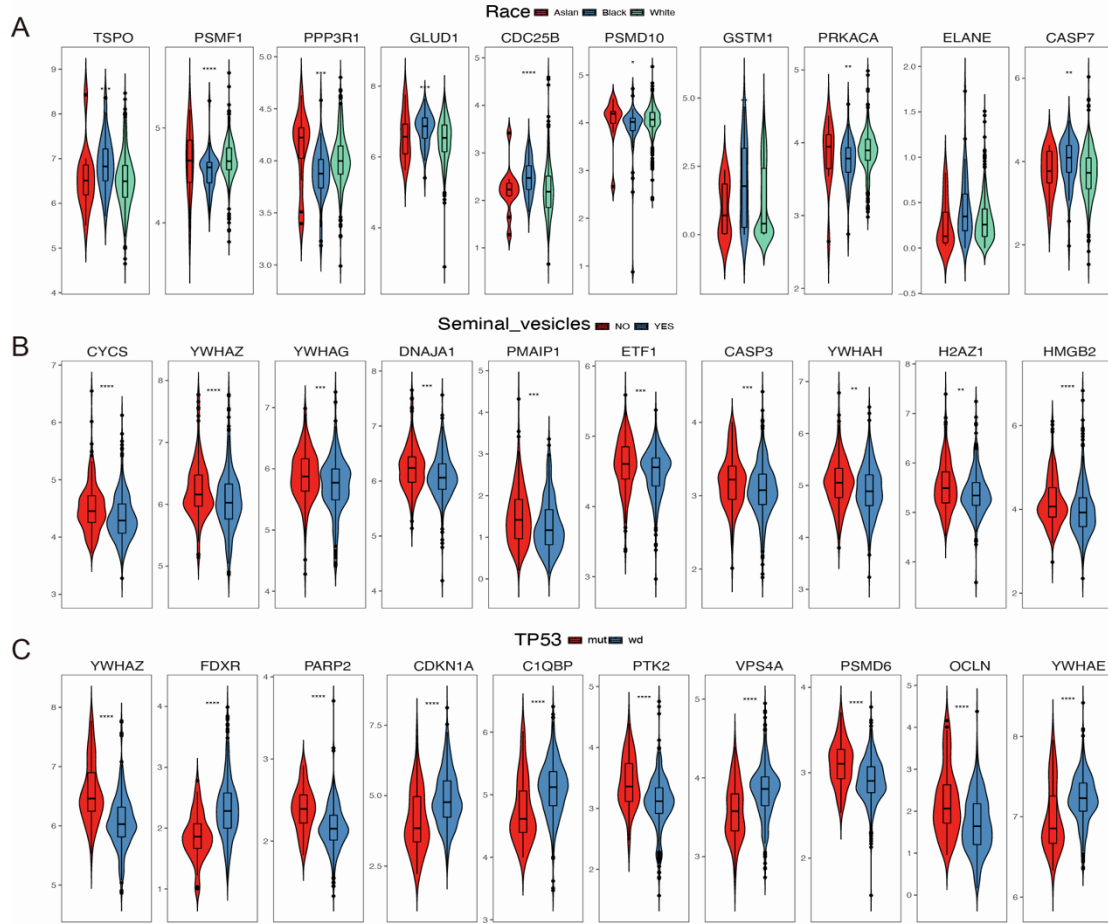

**Figure S4. Clinical Relevance of PANoptosis.** **A** Expression levels of PANoptosis pathway genes in various races in PRAD. **B** Expression levels of PANoptosis pathway genes in patients with and without seminal vesicle invasion. **C** Expression levels of PANoptosis pathway genes in patients with and without *TP53* mutation. \* $P \leq 0.05$ , \*\* $P \leq 0.01$ , \*\*\* $P \leq 0.001$ , \*\*\*\* $P \leq 0.0001$ .

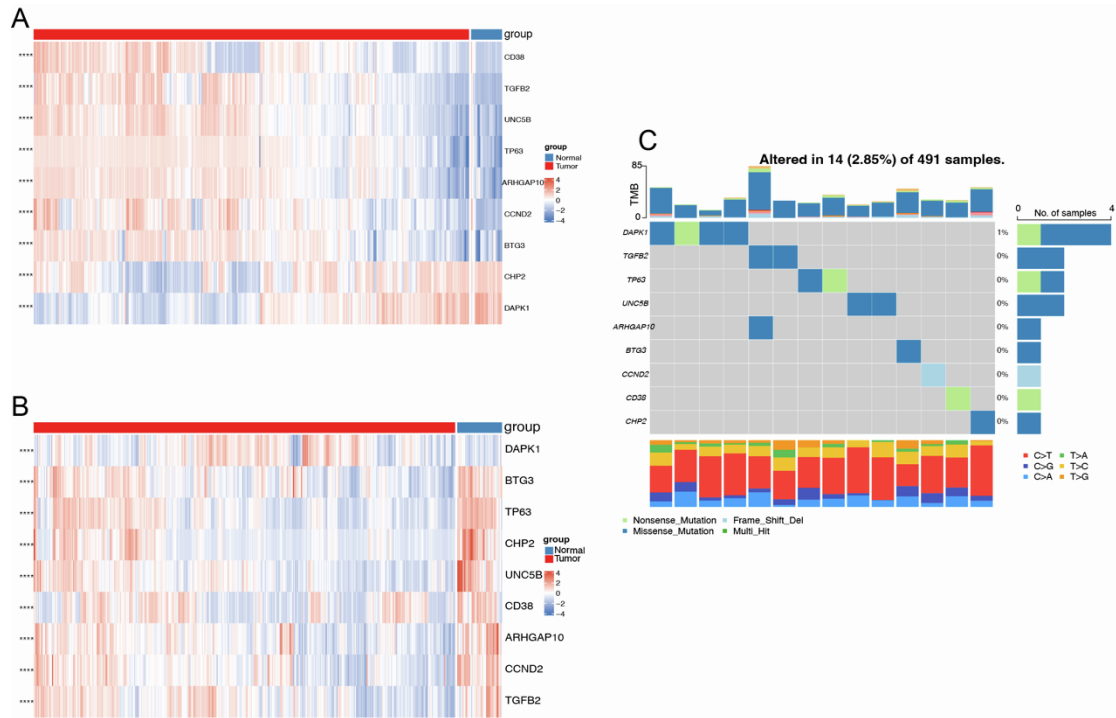

**Figure S5. Overlapping of differentially methylated site genes, differentially expressed transcriptome genes, and mutated genes. A** The methylation status of the nine overlapping genes. **B** Heatmap of transcriptome differential expression. **C** Mutational landscape of nine overlapping genes. \*\*\*\* $P \leq 0.0001$ .

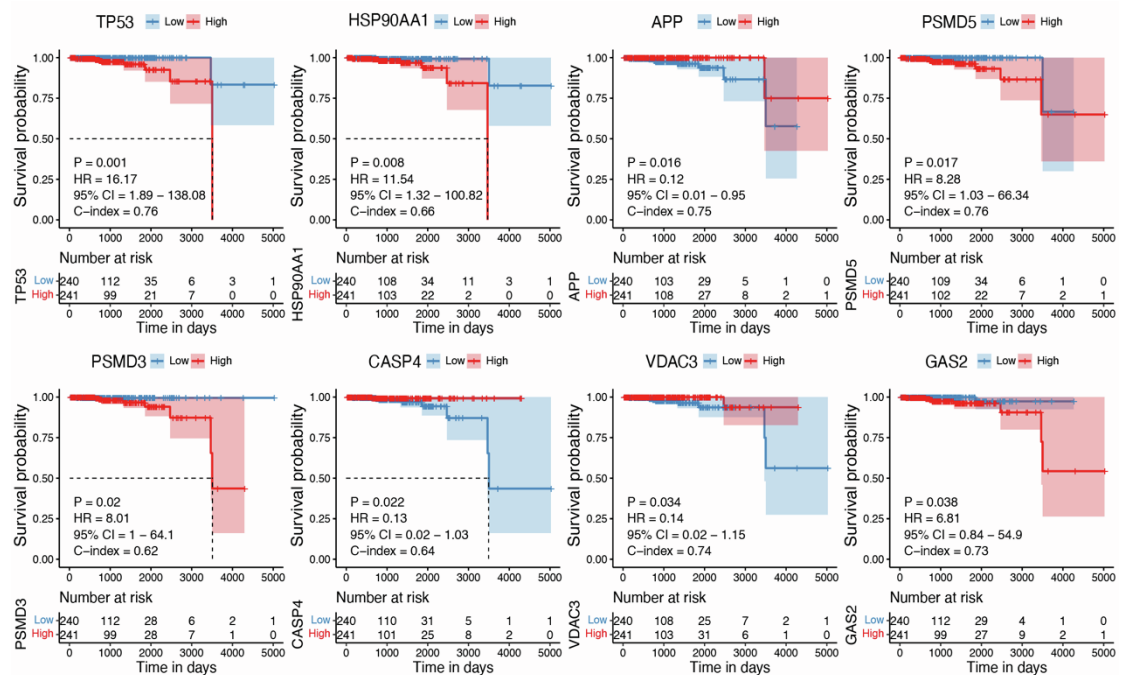

**Figure S6. Expression of PANoptosis pathway genes and overall survival in patients with**

**PRAD.** The Kaplan–Meier survival curves show eight genes whose expression is associated with overall survival.

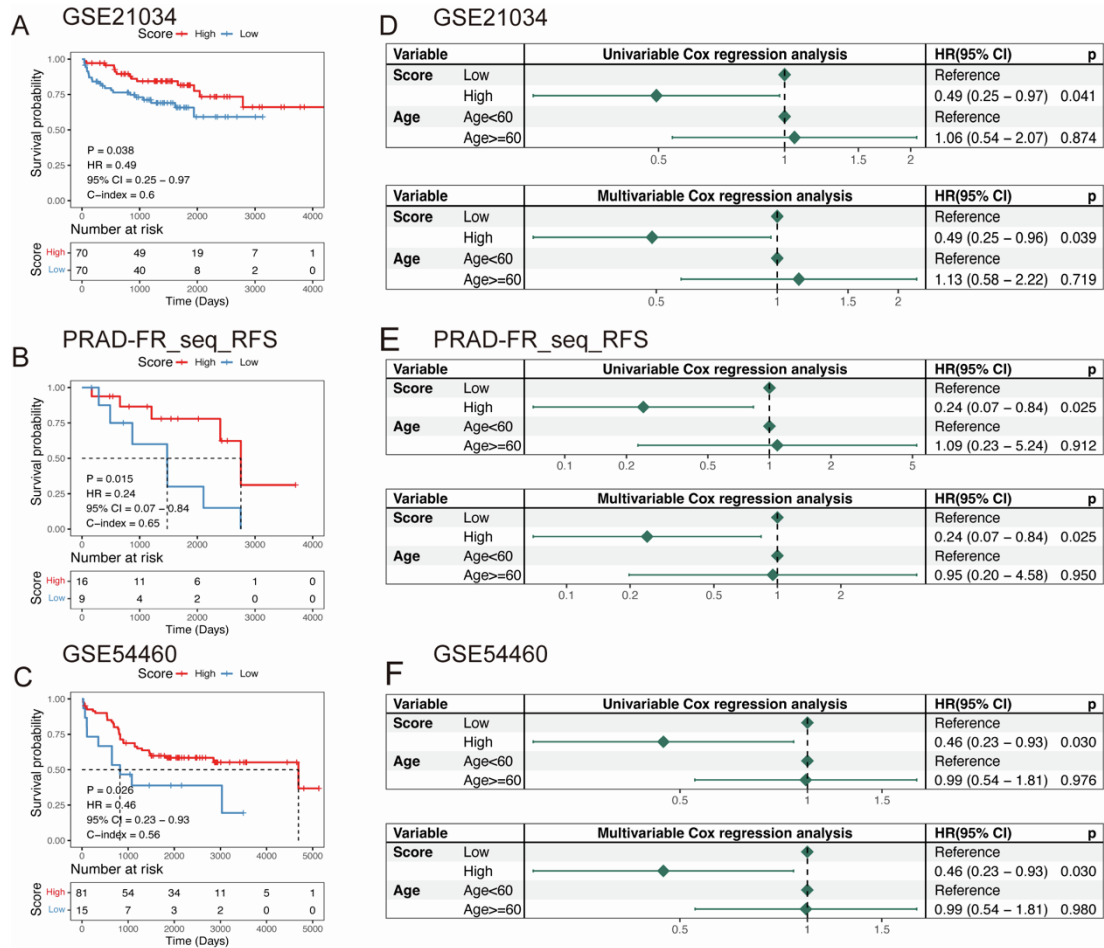

**Figure S7. Validation of PANoptosis signature.** A-C Kaplan–Meier survival curves show the differences in survival probability between high- and low-signature score groups in the validation cohorts (GSE21034, PRAD-FR\_seq\_RFS, and GSE54460). D-F Univariable and multivariable Cox’s regression analysis for the value of prognostic prediction of PANoptosis signature in the validation cohort.

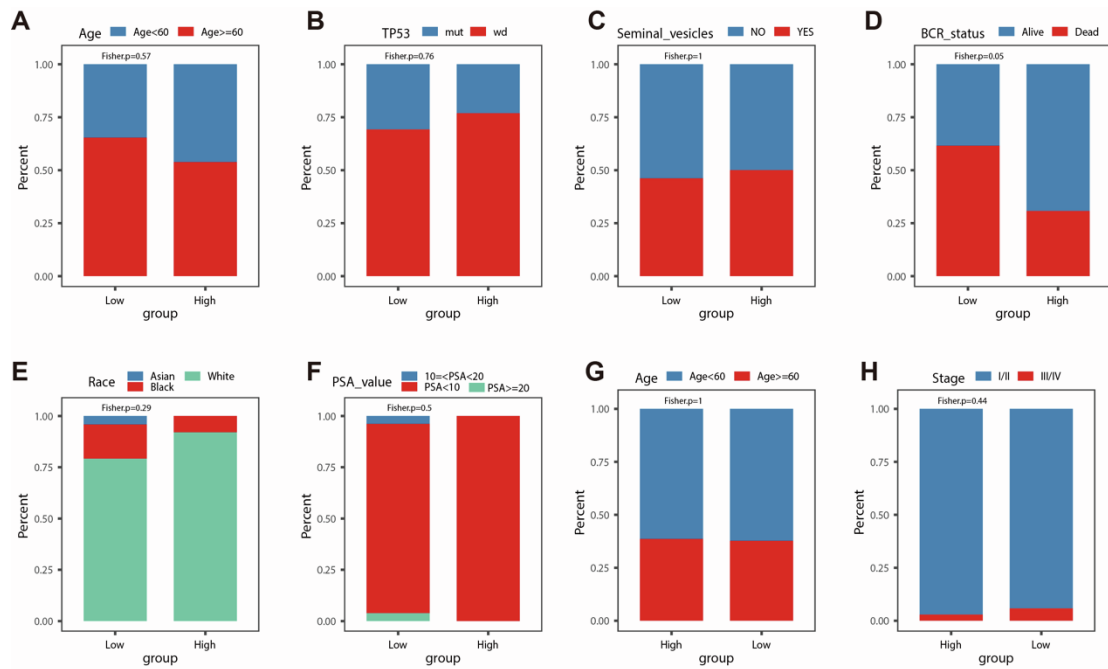

**Figure S8. Clinical features in high- and low-PANoptosis signature score groups.** A-F Age, TP53, seminal vesicles invasion, BCR status, race, and PSA value in high- and low-PANoptosis score groups in the TCGA cohort. G, H Age and clinical stage in low-PANoptosis score groups in the validation cohort (GSE21034). BCR, biochemical recurrence; PSA, prostate-specific antigen.

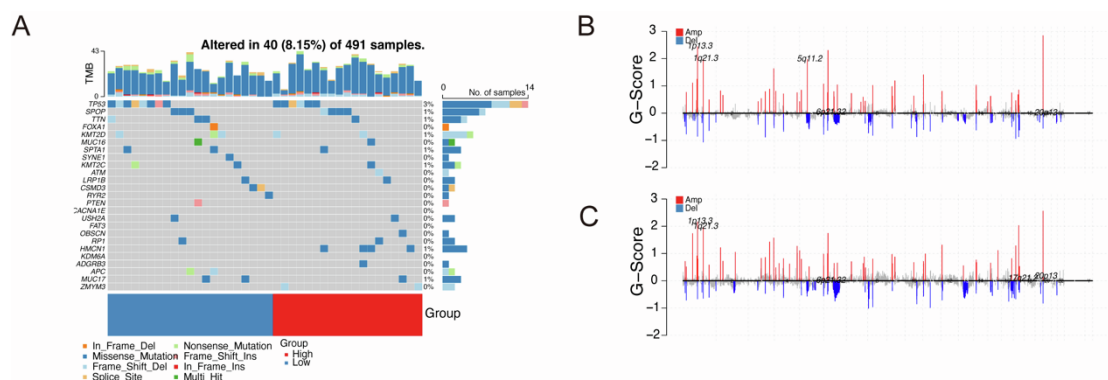

**Figure S9. Genomic alterations between high- and low-PANoptosis signature score groups.** A The mutational landscape of PANoptosis pathway genes altered between high- and low-risk patients with PRAD in the TCGA cohort. B, C G-scores of genomic segments plotted along chromosomes, red for amplifications and blue for deletions. G-scores, The Genomic Identification of Significant Targets in Cancer score.

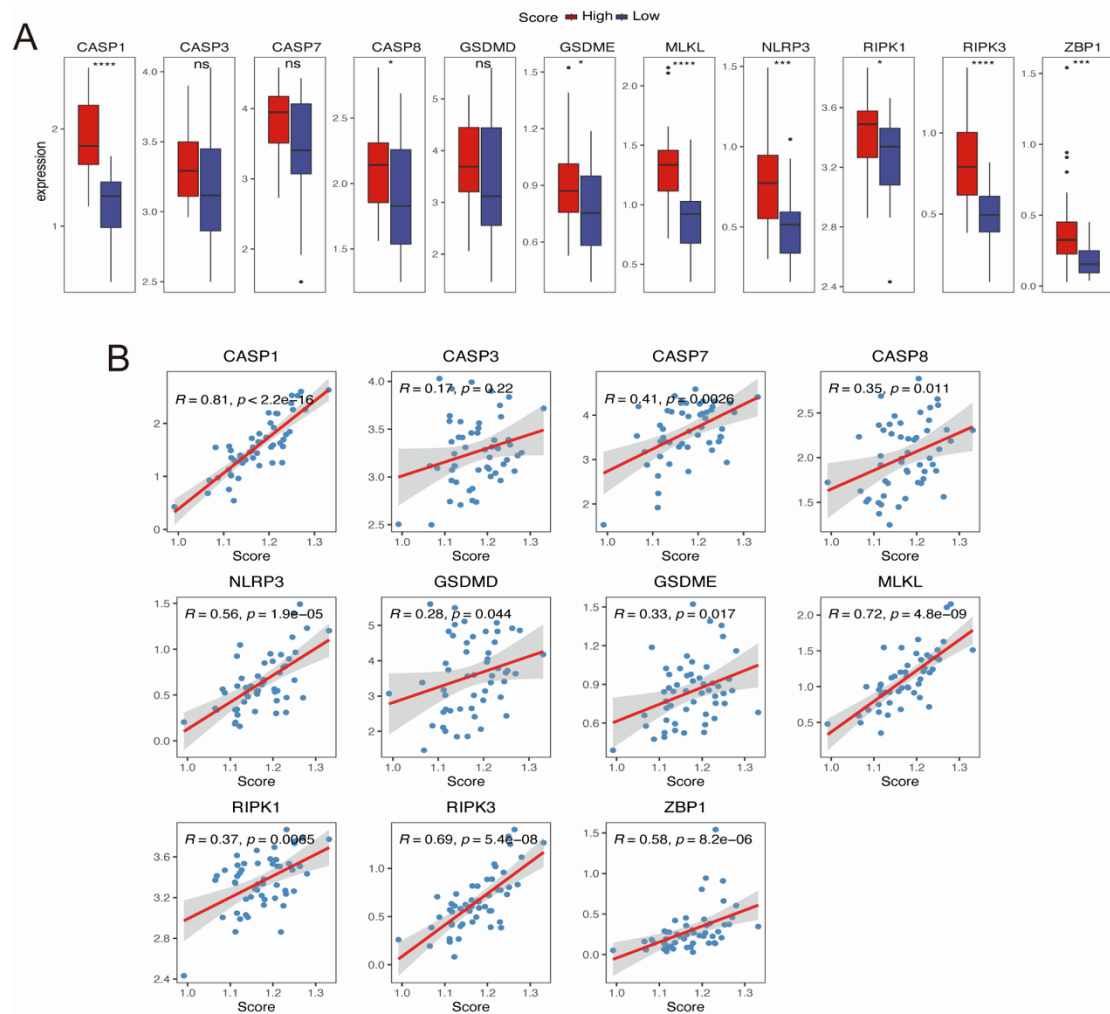

**Figure S10. ZBP1-mediated PANoptosis pathway in PRAD. A** Expression differences of 11 genes from the classic ZBP1-mediated PANoptosis pathway in high- and low-score groups. **B** Correlations between PANoptosis signature score and the expression level of genes involved in ZBP1-mediated PANoptosis.  $*P \leq 0.05$ ,  $**P \leq 0.01$ ,  $***P \leq 0.001$ ,  $****P \leq 0.0001$ , ns: not significant.



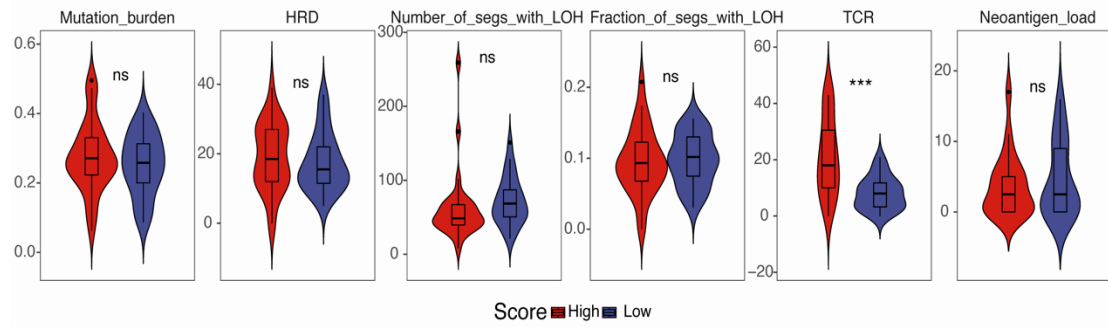

**Figure S11 The role of the PANoptosis signature in tumor immune escape.** TMB, HRD, LOH, CTA, and neoantigen load in the high- and low-score groups. HRD, homologous recombination deficiency; LOH, loss of heterozygosity; TCR, T cell receptor; \*\*\* $P \leq 0.001$ , ns: not significant.

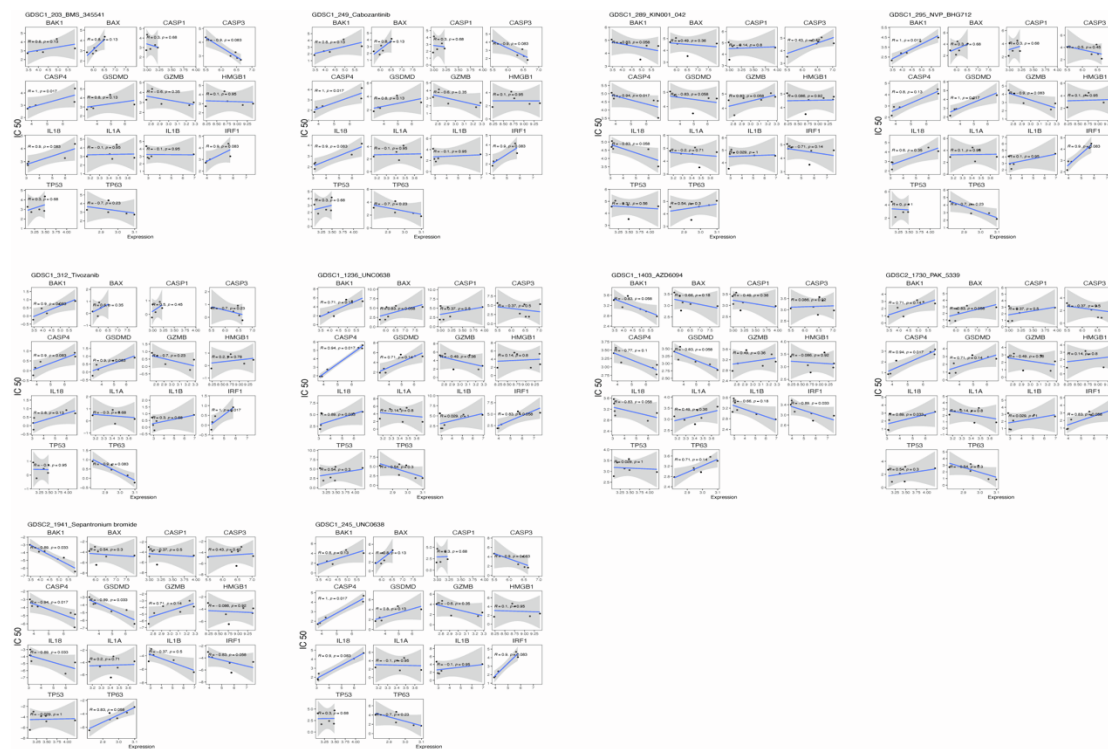

**Figure S12. IC50 of drugs used in PRAD based on PANoptosis signature score.** IC50, half-maximal inhibitory concentration.

**Table S1 Tumor expression profiles and clinical information.**

**Table S2** PANoptosis pathway gene sets

**Table S3** Single nucleotide variant (SNV) data and copy-number variation (CNV) data.

**Table S4** Primer sequences for qPCR

| Gene           | Forward                | Reverse                |
|----------------|------------------------|------------------------|
| ZBP1           | AACATGCAGCTACAATTCCAGA | AGTCTCGGTTCACATCTTTTGC |
| RIPK1          | GGGAAGGTGTCTCTGTGTTTC  | CCTCGTTGTGCTCAATGCAG   |
| CASP1          | GCCTTCACCATTTCATGTGGAT | TTGCTCCGGGTAAAGAGACAG  |
| CASP6          | ATGGCGAAGGCAATCACATTT  | GTGCTGGTTTCCCCGACAT    |
| CASP8          | TTTCTGCCTACAGGGTCATGC  | GCTGCTTCTCTCTTTGCTGAA  |
| FADD           | GCTGGCTCGTCAGCTCAA     | ACTGTTGCGTTCTCCTTCTCT  |
| $\beta$ -Actin | GCGAGTACAACCTTCTTGC    | TATCGTCATCCATGGCGAAC   |

**Table S5** Patients with tumors were separated into two subgroups by analyzing alterations in the methylation state of PANoptosis genes.

**Table S6** Mutation differences between the high- and low-score groups.
